# Supplementary material for: An analysis of the physicochemical properties of oral drugs from 2000 to 2022
Source: Royal Society of Chemistry journal article supplement (doi:10.1039/d4md00160e), 2024-01-01

## Supplementary information

### An analysis of the physicochemical properties of oral drugs from 2000 to 2022

Table S1 – Cross-correlation coefficients ( $r^2$ ) of Lipinski descriptors for the dataset.  $n = 372$

|       | HBAs | HBDs  | clogP |
|-------|------|-------|-------|
| MWt   | 0.69 | 0.27  | 0.65  |
| clogP | 0.12 | -0.14 |       |
| HBDs  | 0.27 |       |       |

Table S2 – Analysis of mean clogP values for neutral and charged compounds

| Level   | N   | Mean      | Std Dev   | Std Err Mean | Lower 95% | Upper 95% |
|---------|-----|-----------|-----------|--------------|-----------|-----------|
| Neutral | 149 | 3.4301221 | 2.1490323 | 0.1760556    | 3.0822147 | 3.7780295 |
| Charged | 229 | 3.4387821 | 2.0254492 | 0.1338455    | 3.1750499 | 3.7025142 |

Figure S1 – Lipinski fails (blue) and passes (red) over time a) Mosaic plot by decade; b) Table of counts; c) Mosaic plot by year; d) Histogram by year.

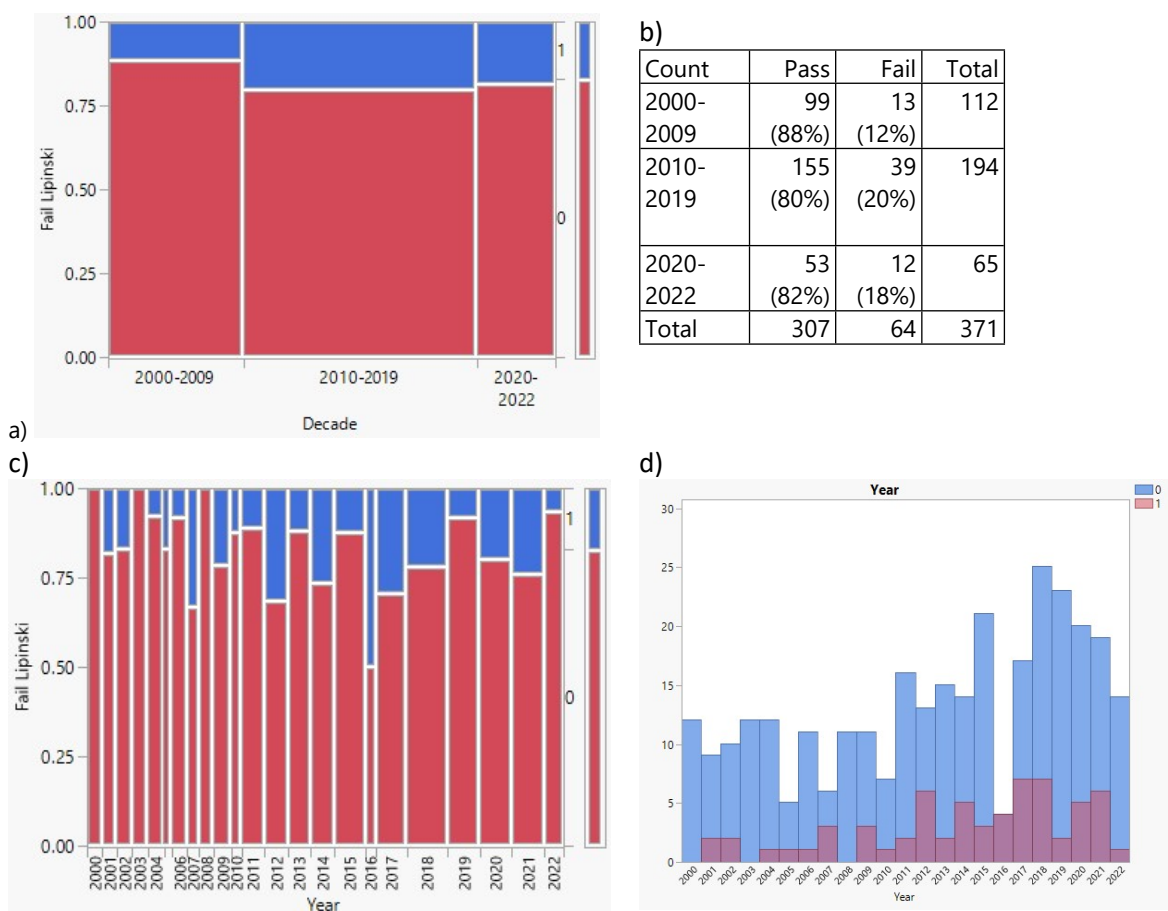

Table S3

Mean  
(std dev)

MWt

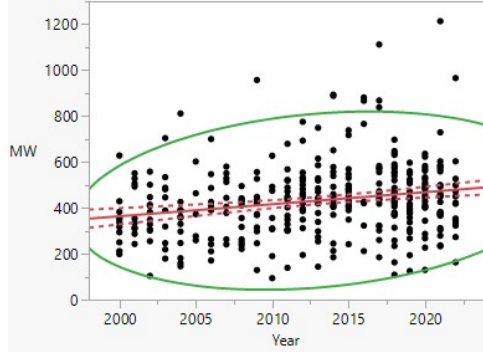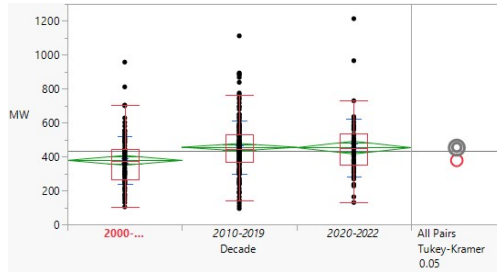

2000-2009 378 (139)\*  
2010-2019 455 (156)  
2020-2022 453 (169)

clogP

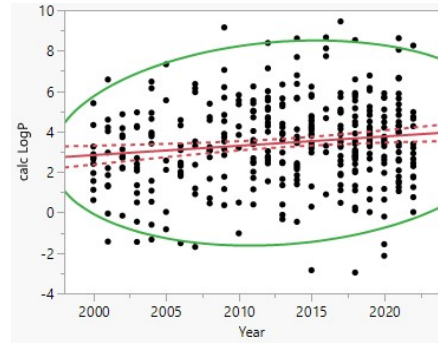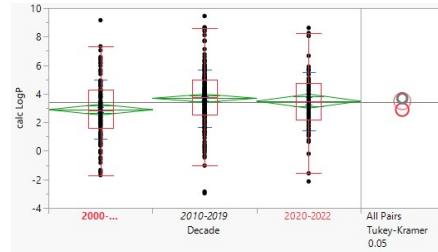

2.9 (2.1)\*\*  
3.7 (2.0)  
3.5 (2.0)

HBDs

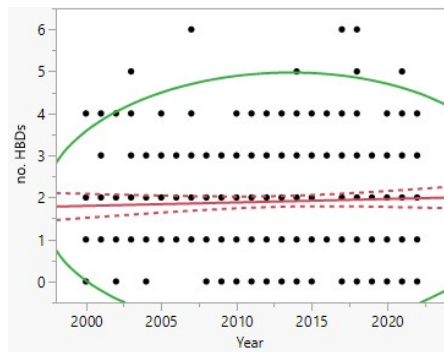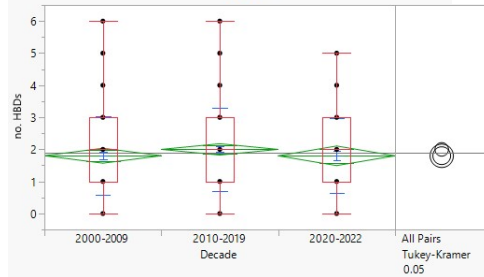

2000-2009 2 (1)  
2010-2019 2 (1)  
2020-2022 2 (1)

HBAs

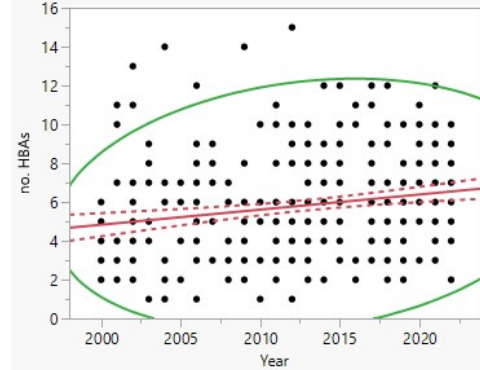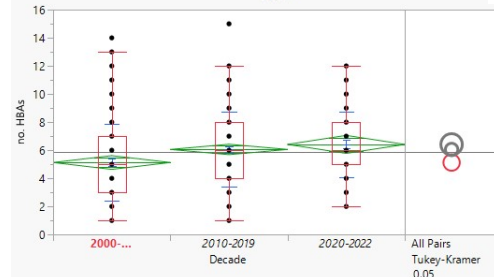

5 (3)\*  
6 (3)  
6 (2)

\*Value statistically significantly different (Tukey-Kramer method), \*\* significantly different from 2010-2019 but not 2020-2022.

Figure S2 – Comparison of a) rotatable bond count; b) aromatic ring count; c) Fsp<sup>3</sup> between the Lipinski passes and fails.

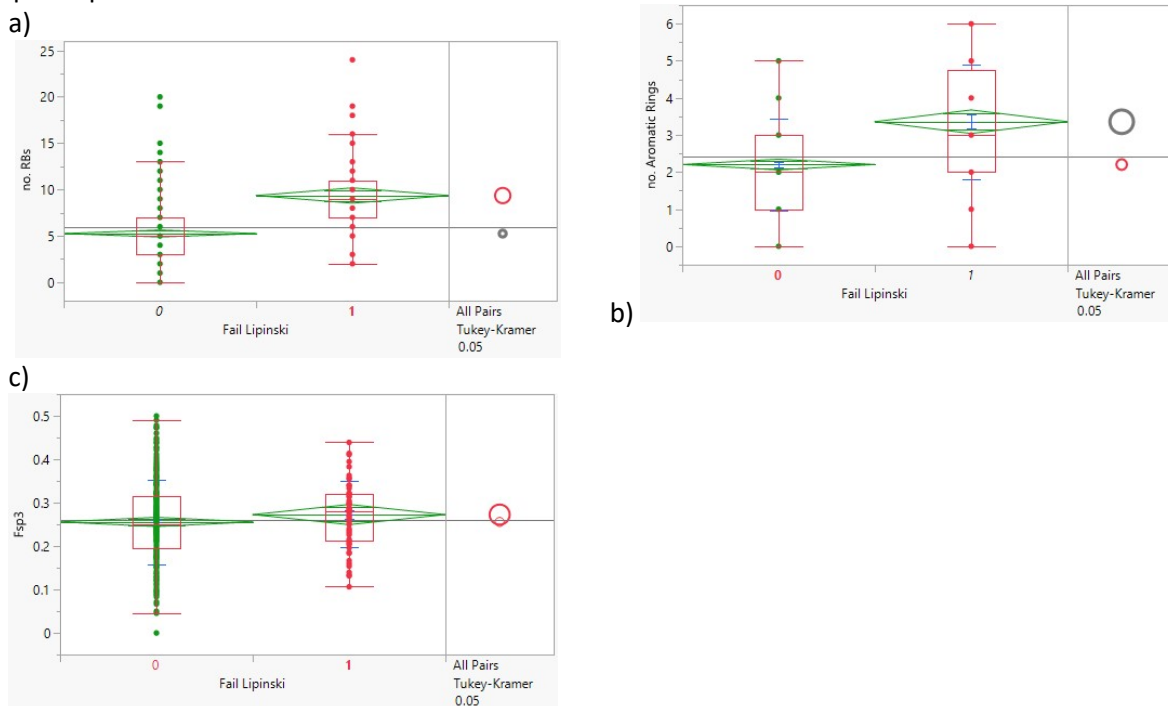

Figure S3 – Variation of a) aromatic ring count; b) Fsp<sup>3</sup> by decade.

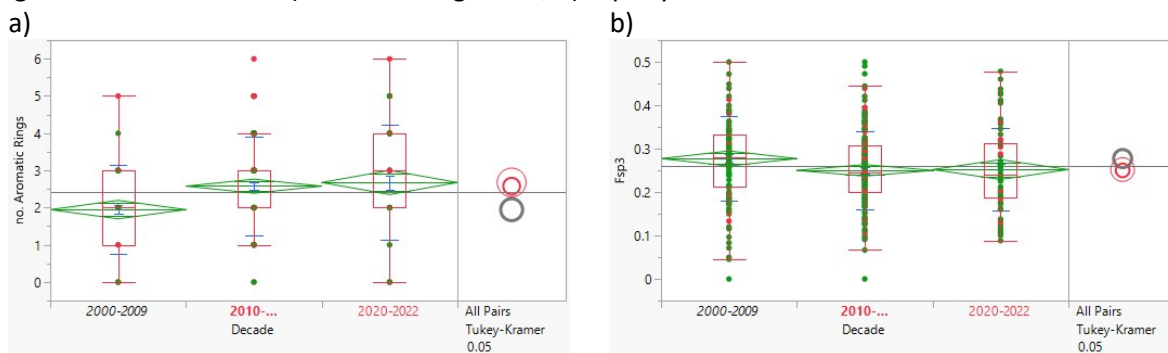

Supplement: d4md00160e1.pdf [file d4md00160e1.pdf]
